# Supplementary material
Source: publisher figshare collection journal article supplement (https://acs.figshare.com/ndownloader/files/4672861)

Supporting Information for

**Six-Membered Ring Chelate Complexes of Ru(II):**

**Structural and Photophysical Effects**

Maria Abrahamsson<sup>1</sup>, Hans-Christian Becker<sup>1</sup>, and Leif Hammarström<sup>1\*</sup>

Celine Bonnefous<sup>2</sup>, Charles Chamchoumis<sup>2</sup>, and Randolph P. Thummel<sup>2\*</sup>

**Figure S1:** B3LYP/LANL2DZ isosurfaces at 0.02 for LUMO (upper panels) and HOMO (lower panels). The left panels are for  $[\text{Ru}(\mathbf{3})_2]^{2+}$  and the right panels are for  $[\text{Ru}(\mathbf{4})_2]^{2+}$ .

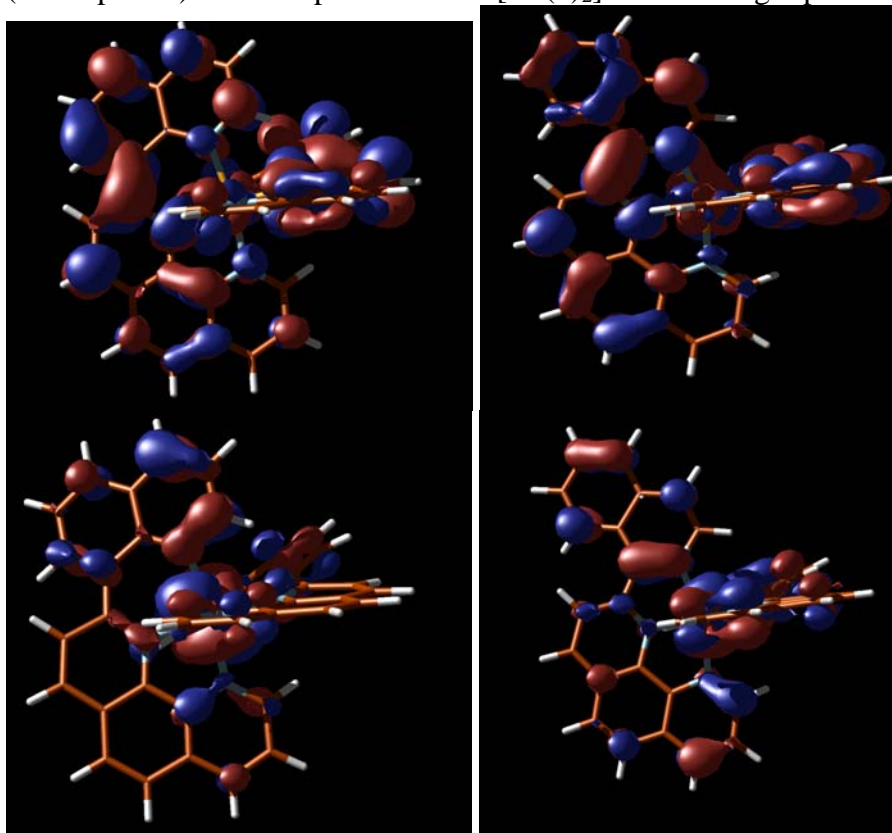

Supplement: Supplementary file 1 [file 4672861]
